# Supplementary material
Source: Research Square preprint supplement (doi:10.21203/rs.3.rs-9220409/v1)
Supplement: Supplementary file 1 [file 8803778fd4fa9b2bb70724db.docx]

# Supplementary Materials for Strategic Value of Cloud Computing for Practo: An Exploratory Case Study

## Abstract

These supplementary materials support the manuscript *Strategic Value of Cloud Computing for Practo: An Exploratory Case Study*, providing additional data, methodological details, and visualizations to enhance transparency, reproducibility, and practical application. Included are detailed data tables, the interview protocol, an expanded NVivo codebook, a document list, ethical approval details, and a visualization of the proposed strategic framework. These materials address the study’s objectives of evaluating cloud computing’s impact on Practo Technologies’ operational performance, trust-building, innovation, and sustainability in India’s healthcare sector.

## 1. Supplementary Data Tables

To ensure transparency and support the findings presented in the manuscript, the following tables provide detailed quantitative data underpinning the Balanced Scorecard (BSC) analysis. These tables expand on Tables A1–A4 in the manuscript’s Appendix A, offering additional metrics and verification sources.

**Table S1: Financial Perspective – Extended Metrics**

This table details financial performance metrics, including cost savings, revenue impacts, and innovation velocity, with verification sources.

| **Metric** | **Pre-Cloud (2021)** | **Post-Cloud (2024)** | **Target** | **Verification Source** | **Cloud-Enabling Initiative** |
| --- | --- | --- | --- | --- | --- |
| Infrastructure costs (% revenue) | 18.4% | 12.7% | 15% | Practo Annual Reports (2021–2024), EY Audit | Shift from CAPEX to OPEX model |
| Server utilization rate | 31.7% | 75% | 75% | Practo Infra Logs, DataDog Reports | Container orchestration, auto-scaling |
| Revenue from cloud-enabled services | 0% | 10% | 20% | Practo Financial Statements | AI diagnostics, predictive healthcare |
| Time-to-market for new features | 87 days | 30 days | 30 days | Practo Product Development Logs | CI/CD pipelines, microservices architecture |
| Annual cost savings (₹ crore) | - | 14.2 | 15.0 | Practo Financial Reports | Dynamic resource scaling |
| Contribution margin | -1% | 40% | 35% | Practo Internal Analytics | Seasonal demand optimization |

**Note**: Data verified through audited financial reports and internal system logs, ensuring accuracy. The 40% contribution margin reflects both cost reductions and revenue growth from cloud-enabled services.

**Table S2: Customer Perspective – Extended Metrics**

This table expands on customer engagement metrics, including user experience (UX) and trust indicators.

| **Metric** | **Pre-Cloud (2021)** | **Post-Cloud (2024)** | **Target** | **Verification Source** | **Cloud-Enabling Initiative** |
| --- | --- | --- | --- | --- | --- |
| Customer satisfaction rating | 82% | 88% | 95% | UMUX, UEQ-S, SUS Surveys (n=14,236) | UX redesign, AI-powered chatbots |
| Application response time (seconds) | 2.7 | 0.8 | <1 | New Relic Monitoring | Content Delivery Network (CDN), edge computing |
| Platform uptime | 99.6% | 99.98% | 99.99% | Practo System Logs | Multi-region deployment |
| Personalized recommendation rate | 23% | 68% | 70% | Practo Analytics Platform | ML-powered health guidance systems |
| Unauthorized access incidents | 1,200/year | 72/year | 0 | SIEM Reports | Cloud-native security tools |
| Trust score (out of 100) | 76 | 88 | 90 | Patient Surveys (n=1,245) | Enhanced security protocols |

**Note**: Trust score improvements were particularly pronounced among elderly users (42% adoption increase), validated through demographic-stratified surveys.

**Table S3: Internal Processes – Extended Metrics**

This table provides additional process efficiency metrics, focusing on operational resilience and interoperability.

| **Metric** | **Pre-Cloud (2021)** | **Post-Cloud (2024)** | **Target** | **Verification Source** | **Cloud-Enabling Initiative** |
| --- | --- | --- | --- | --- | --- |
| Deployment time (hours) | 43 | 1 | 1 | Practo DevOps Logs | CI/CD, containerization |
| Recovery time after failure (minutes) | 222 | 15 | 15 | DataDog Incident Reports | Auto-healing infrastructure, multi-region failover |
| Security compliance score | 87% | 99% | 99% | ISO 27001 Audit Reports | Automated compliance audits |
| Maintenance downtime (hours/month) | 7.3 | <1 | <1 | Practo System Logs | Blue-green deployments, Infrastructure as Code (IaC) |
| Integrated healthcare systems | 43 | 126 | 150 | Practo Interoperability Reports | Cloud-based iPaaS solutions |
| Data exchange success rate | 76% | 94% | 95% | Practo Analytics | API standardization |

**Note**: Interoperability improvements reduced redundant diagnostics by 17%, supporting sustainable healthcare delivery.

**Table S4: Learning and Growth – Extended Metrics**

This table details organizational capability metrics, emphasizing innovation and employee development.

| **Metric** | **Pre-Cloud (2021)** | **Post-Cloud (2024)** | **Target** | **Verification Source** | **Cloud-Enabling Initiative** |
| --- | --- | --- | --- | --- | --- |
| AI/ML-powered features | 0 | 7 | 20 | Practo Product Roadmap | Predictive models, symptom checkers |
| Innovation time allocation (%) | 12% | 30% | 30% | Employee Surveys (n=150) | DevOps culture, infrastructure automation |
| Integrated healthcare providers | 200 | 634 | 5,000 | Practo Partner Database | Open API platform, interoperability standards |
| Data processing capacity (TB/day) | 2.5 | 11.3 | 100 | Practo Analytics Platform | Data lakes, big data pipelines |
| Developer productivity (story points/sprint) | 50 | 71 | 80 | Jira Sprint Reports | Cloud-native DevOps practices |
| Employee satisfaction (%) | 65% | 86% | 90% | Internal HR Surveys | Reduced maintenance, cloud certifications |

**Note**: Employee satisfaction increased due to fewer after-hours emergencies, with 78% of technical staff reporting improved work-life balance.

**2. Interview Protocol**

The semi-structured interview protocol was designed to capture insights across the BSC dimensions and address the research questions on trust, sustainability, and strategic frameworks. The protocol was tailored for each participant group (Practo stakeholders and external experts) to ensure relevance and depth.

**Interview Protocol**

**Introduction**:

- Thank you for participating. This interview explores Practo’s cloud computing adoption and its impacts on operations, trust, and sustainability.
- The interview will last approximately 45–60 minutes, is audio-recorded with consent, and responses will be anonymized.
- Feel free to elaborate or skip any question.

**General Questions** (All Participants):

1. Can you describe Practo’s cloud adoption journey, including key milestones and challenges?
2. How has cloud computing influenced Practo’s strategic objectives in healthcare delivery?
3. What changes have you observed in stakeholder trust since cloud adoption?

**BSC-Specific Questions**:

- **Financial Perspective** (C-suite, IT Lead):
  - How has cloud computing affected Practo’s cost structure and revenue streams?
  - Can you provide examples of financial benefits from cloud scalability?
- **Customer Perspective** (Provider, Patient):
  - How have platform reliability and personalization improved user experience?
  - What role does data security play in building trust with patients and providers?
- **Internal Processes** (IT Lead, Compliance Manager):
  - How has cloud infrastructure streamlined operational processes like deployments and compliance?
  - What improvements in interoperability have you observed?
- **Learning and Growth** (C-suite, Product Head):
  - How has cloud adoption fostered innovation and employee development?
  - What new capabilities (e.g., AI/ML) have emerged from cloud infrastructure?

**Research Question-Specific Questions**:

- **Trust (RQ1)**: What specific cloud features (e.g., security protocols) enhance stakeholder confidence?
- **Sustainability (RQ2)**: How does cloud computing support Practo’s mission for accessible, equitable healthcare?
- **Strategic Framework (RQ3)**: What factors should healthcare platforms consider when evaluating cloud solutions?

**Closing**:

- Are there other impacts of cloud adoption we haven’t discussed?
- Do you have recommendations for similar platforms adopting cloud technology?
- Thank you for your insights. We may follow up for clarification.

**Note**: The protocol was pilot tested with one internal stakeholder, refined for clarity, and approved by the research team.

**3. Expanded NVivo Codebook**

The NVivo codebook used for thematic analysis is expanded here to provide detailed definitions, inclusion/exclusion criteria, and additional example quotes, supporting the qualitative rigor required by the FBR 7 String Framework (Ghosh, 2025).

**Table S5: Expanded NVivo Codebook**

| **Theme** | **Subthemes** | **Definition** | **Inclusion Criteria** | **Exclusion Criteria** | **Example Quote** |
| --- | --- | --- | --- | --- | --- |
| **Trust Infrastructure** | Data security, compliance, auditability | Mechanisms enabling confidence in data handling via cloud | References to security protocols, compliance, transparency | General trust without technical linkage | “Our ISO audits are smoother and more proactive.” |
| **Operational Resilience** | System uptime, RTO/RPO | Capabilities ensuring business continuity and disaster recovery | Mentions of uptime, recovery times, failover systems | Non-cloud-related operational issues | “Downtime used to be hours; now it’s minutes.” |
| **Personalization & UX** | Latency, recommendations, engagement | Platform responsiveness and relevance to user needs | Discussions of response time, personalization, UX metrics | Generic user satisfaction without cloud context | “Recommendations got much more relevant lately.” |
| **Innovation Enablement** | DevOps, AI/ML services | Tools and processes for rapid feature development | References to deployments, AI/ML, DevOps practices | Innovation not tied to cloud infrastructure | “We’re pushing daily builds now, not fortnightly.” |
| **Learning Organization** | Knowledge sharing, collaboration | Cloud-facilitated learning and adaptability | Mentions of training, certifications, team collaboration | General organizational culture without cloud linkage | “Slack and GDocs changed how fast we iterate.” |

**Note**: The codebook was developed iteratively, with inter-coder agreement (Cohen’s kappa = 0.81) ensuring reliability. Subthemes were aligned with BSC dimensions to structure findings.

**4. Document List**

The following table lists the 47 corporate documents and 18 industry reports analyzed, providing metadata for traceability and transparency.

**Table S6: Document List**

| **Doc ID** | **Document Type** | **Source** | **Year** | **Title/Description** | **Purpose** |
| --- | --- | --- | --- | --- | --- |
| A1.1–A1.6 | Annual Reports (x6) | Practo Technologies | 2018–2024 | Practo Annual Reports | Financial performance, strategic milestones |
| A2.1–A2.5 | White Papers (x5) | Practo | 2019–2024 | Cloud Strategy, UX Enhancements | Cloud migration plans, user experience |
| A3.1–A3.18 | Industry Reports (x18) | IDC, McKinsey, NASSCOM | 2019–2024 | Healthcare IT Trends, Cloud Maturity in India | Benchmarking trends, cloud-health adoption |
| A4.1–A4.4 | Technical Documents (x4) | Practo Infra Team | 2020–2023 | Security Architecture, DevOps Practices | Technical implementation details |
| A5.1–A5.86 | Peer-reviewed Articles (x86) | Various academic journals | 2017–2024 | Cloud Computing, Trust, Healthcare Adoption | Theoretical framing, case comparisons |
| A6.1–A6.24 | UX Analytics & Metrics | Practo Internal Data | 2021–2024 | User Engagement, Satisfaction, Personalization | Quantitative UX and trust metrics |

**Note**: Documents were sourced from Practo’s public and internal repositories, with industry reports accessed via institutional subscriptions. Peer-reviewed articles were retrieved from Scopus and Web of Science databases.

**5. Ethical Approval Documentation**

The study received an Institutional Review Board (IRB) exemption from [Institution Name Redacted] on [Date Redacted], as it utilized publicly available documents and anonymized interview data. The exemption was justified under the following criteria:

- No sensitive patient data were collected; all analytics were aggregate or de-identified.
- Interviews were conducted with informed consent, with participants informed of their right to withdraw.
- Participant identities were anonymized using codes (e.g., C1–C5) to ensure confidentiality.
- Audio recordings were stored on a secure, encrypted server and deleted after transcription.

The research adhered to ethical guidelines outlined in the Declaration of Helsinki and APA ethical standards. Consent forms and exemption documentation are available upon request from the corresponding author, subject to institutional approval.

**6. Strategic Framework Visualization**

The manuscript proposes a four-domain strategic framework for evaluating cloud adoption in emerging market healthcare platforms: Trust Infrastructure Assessment, Operational Sustainability Analysis, Innovation Capacity Evaluation, and Organizational Readiness Determination. The following visualization illustrates the framework’s structure and key components.

**Figure S1: Strategic Framework for Cloud Adoption**

- **Trust Infrastructure Assessment**: Includes Privacy Control (encryption, anonymization), Security Architecture (threat mitigation, compliance), Reliability (uptime, disaster recovery), and Transparency (data usage visibility).
- **Operational Sustainability Analysis**: Covers Financial Sustainability (TCO, revenue), Environmental Sustainability (energy efficiency, carbon footprint), Access Sustainability (service availability), and Operational Resilience (disaster recovery).
- **Innovation Capacity Evaluation**: Encompasses Technology Capability (AI/ML, analytics), Innovation Acceleration (development velocity), Ecosystem Integration (APIs, interoperability), and Future-Readiness (scalability, emerging tech).
- **Organizational Readiness Determination**: Includes Skill Gap Analysis (training needs), Cultural Readiness (innovation culture), Process Maturity (DevOps, security), and Implementation Roadmap (migration plans). Each domain is depicted as a quadrant with subcomponents listed, connected by arrows indicating iterative evaluation. The diagram is titled “Strategic Framework for Cloud Adoption in Emerging Market Healthcare Platforms.”

**Innovation Capacity Evaluation**

- Technology Capability

- Innovation Acceleration

- Ecosystem Integration

- Future-Readiness

**Organizational Readiness Determination**

- Skill Gap Analysis

- Cultural Readiness

- Process Maturity

- Implementation Roadmap

**Strategic Framework for Cloud Adoption in Emerging Market Healthcare Platforms**

**Operational Sustainability Analysis**

- Financial Sustainability

- Environmental Sustainability

- Access Sustainability

- Operational Resilience

**Trust Infrastructure Assessment**

- Privacy Control

- Security Architecture

- Reliability

- Transparency
